# Supplementary material
Source: PubMed Central journal article supplement (PMC6446936)

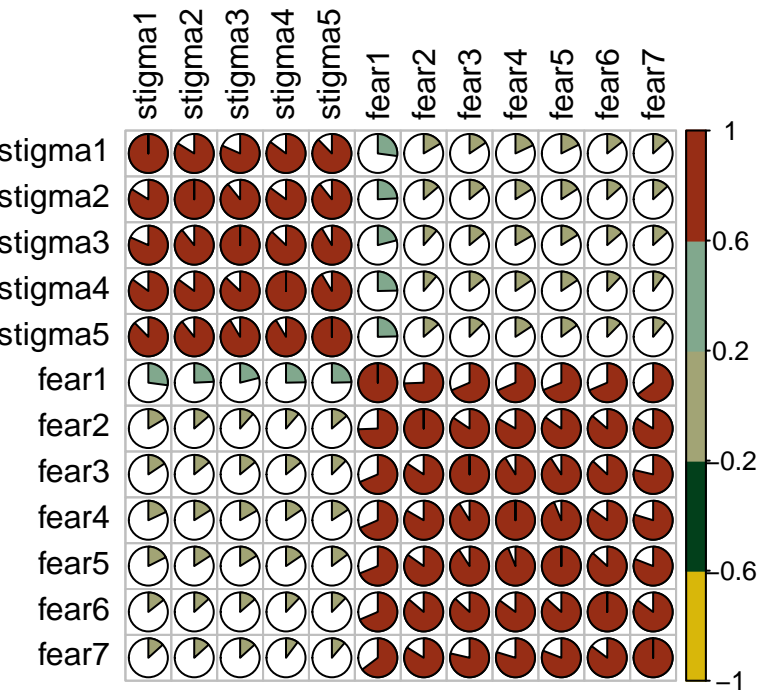

Supplement: NIHMS1524965-supplement-12110_2018_9335_MOESM2_ESM.pdf [file NIHMS1524965-supplement-12110_2018_9335_MOESM2_ESM.pdf]
